# Supplementary material for: Subpopulations of neurons in lOFC encode previous and current rewards at time of choice
Source: eLife journal article supplement (doi:10.7554/elife.70129), 2021-10-25

**A**

Average angle among neighbors,  
PSTH feature space

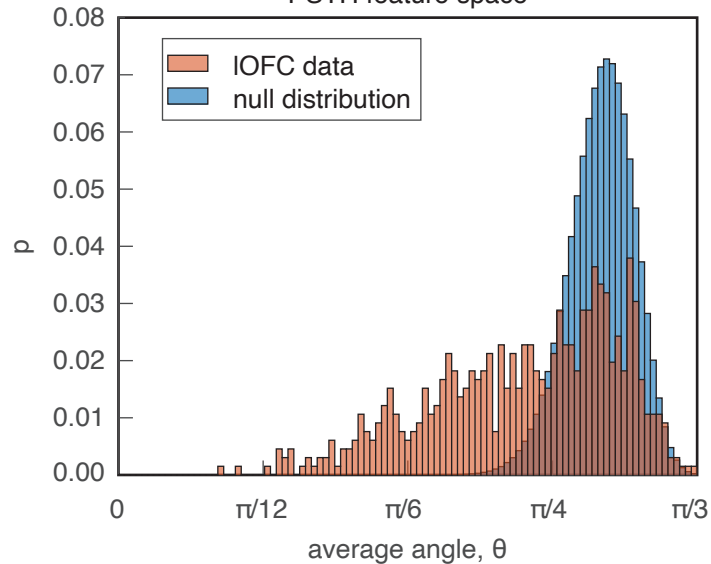**B**

Average angle among neighbors,  
conditional feature space

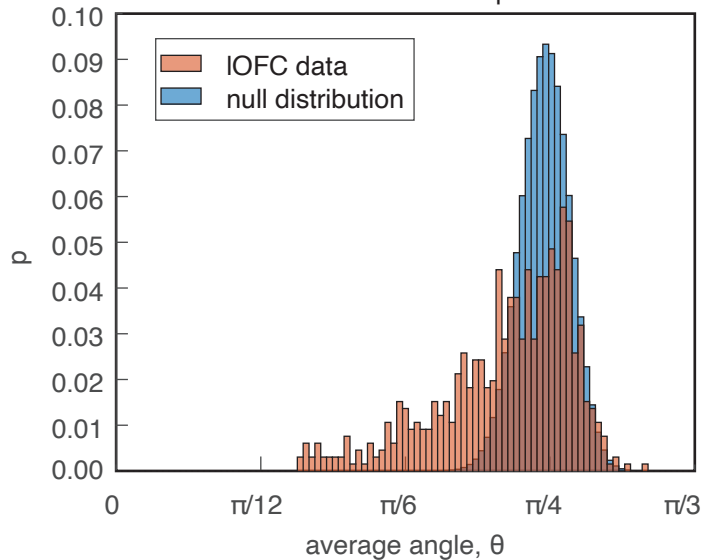

Supplement: supp [file elife_poa_e70129_Figure_2_figure_supplement_3.pdf › elife_poa_e70129_Figure_2_figure_supplement_3.pdf]
