# Supplementary material for: Subpopulations of neurons in lOFC encode previous and current rewards at time of choice
Source: eLife journal article supplement (doi:10.7554/elife.70129), 2021-10-25

**A**

ARI, PSTH feature space

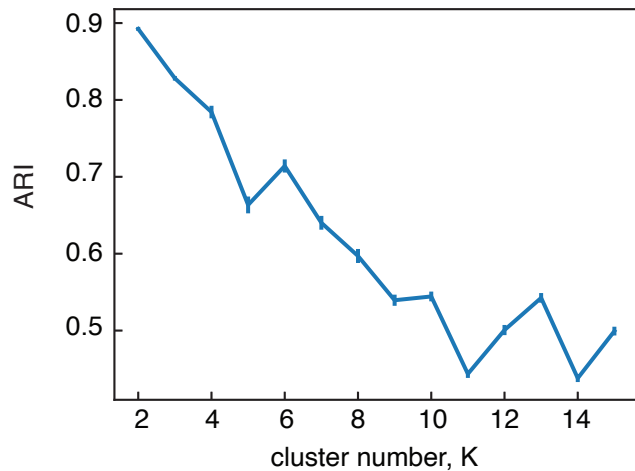**B**

Silhouette score, PSTH feature space

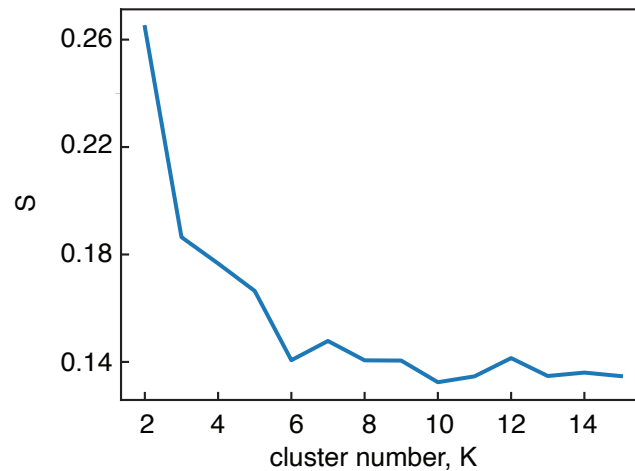**C**

ARI, conditional feature space

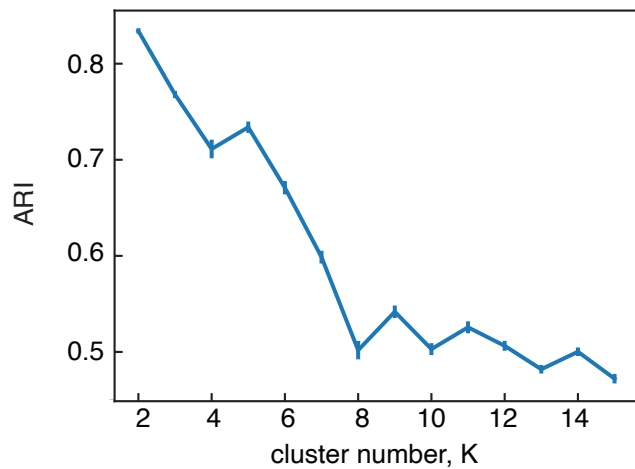**D**

Silhouette score, conditional feature space

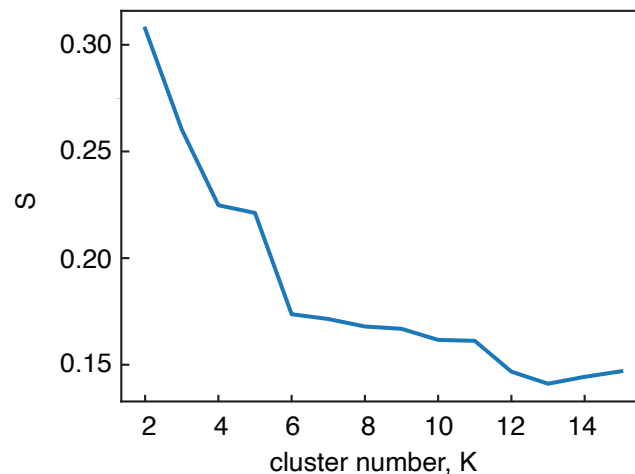

Supplement: supp [file elife_poa_e70129_Figure_2_figure_supplement_4.pdf › elife_poa_e70129_Figure_2_figure_supplement_4.pdf]
