# Supplementary figures and images for: Subpopulations of neurons in lOFC encode previous and current rewards at time of choice
Source: eLife journal article supplement (doi:10.7554/elife.70129), 2021-10-25

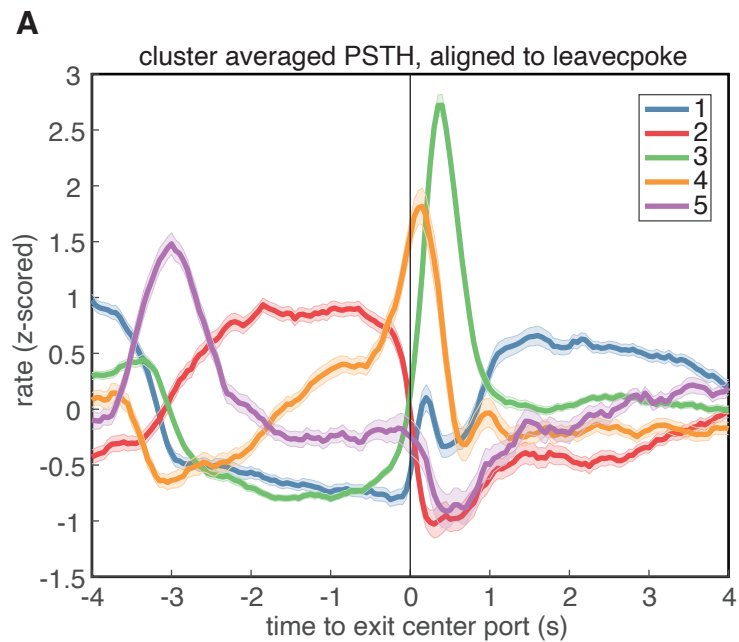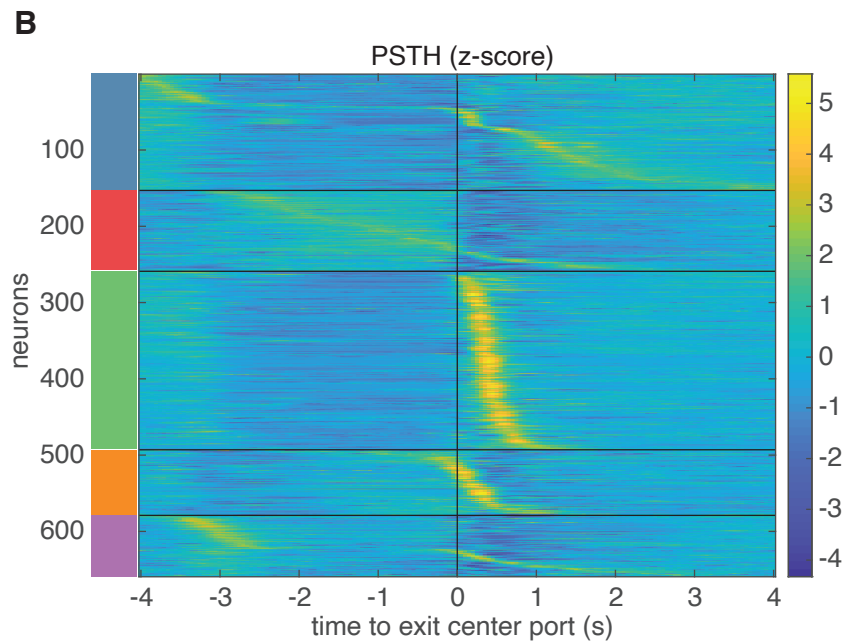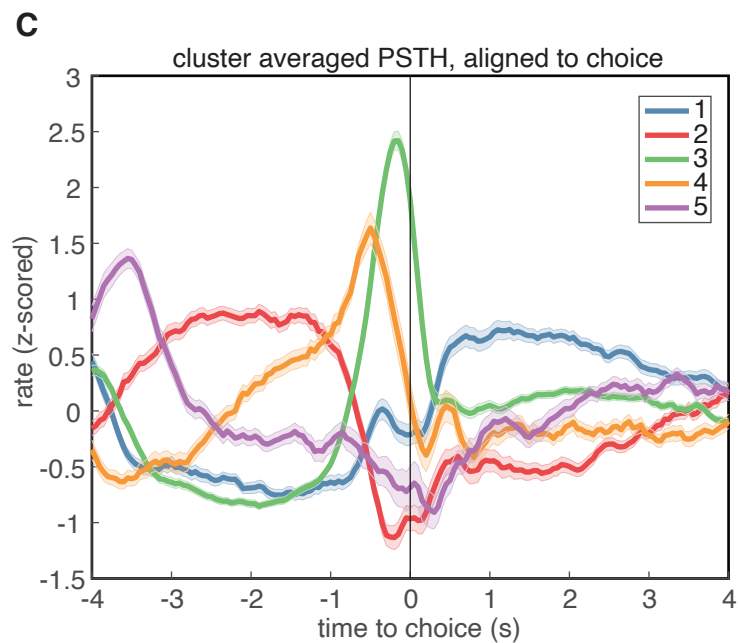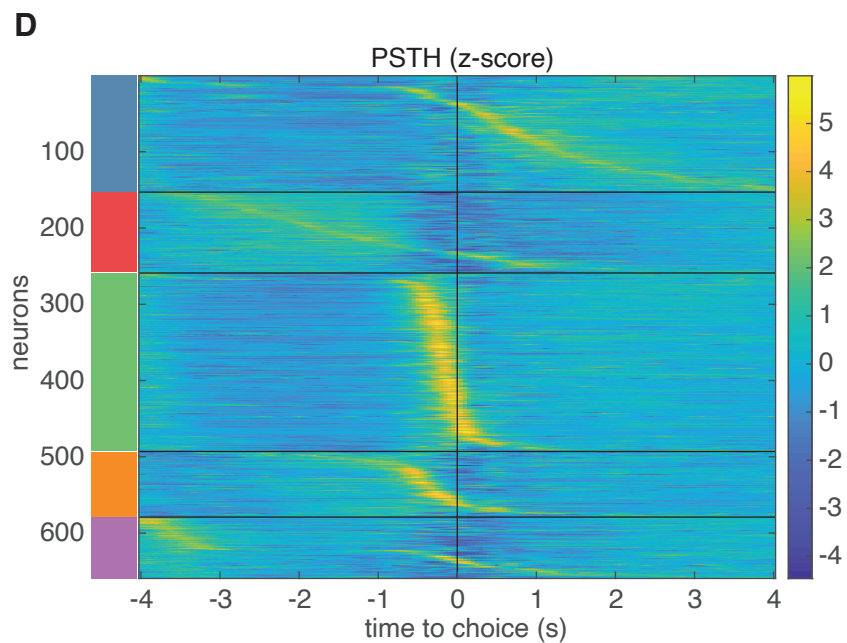

Supplement: supp [file elife_poa_e70129_Figure_1_figure_supplement_1.pdf › elife_poa_e70129_Figure_1_figure_supplement_1.pdf]

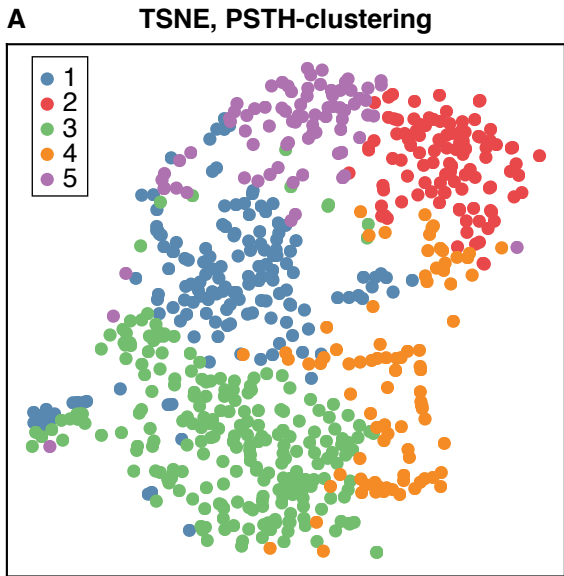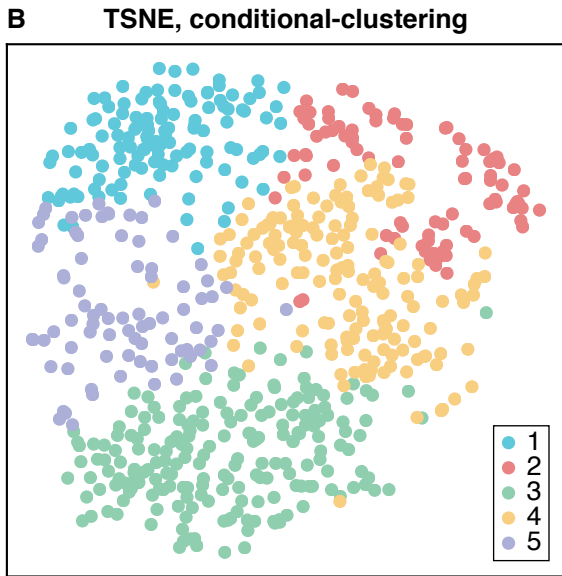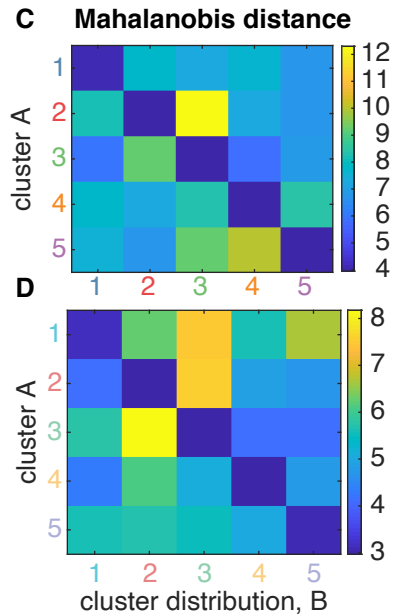

Supplement: supp [file elife_poa_e70129_Figure_1_figure_supplement_2.pdf › elife_poa_e70129_Figure_1_figure_supplement_2.pdf]

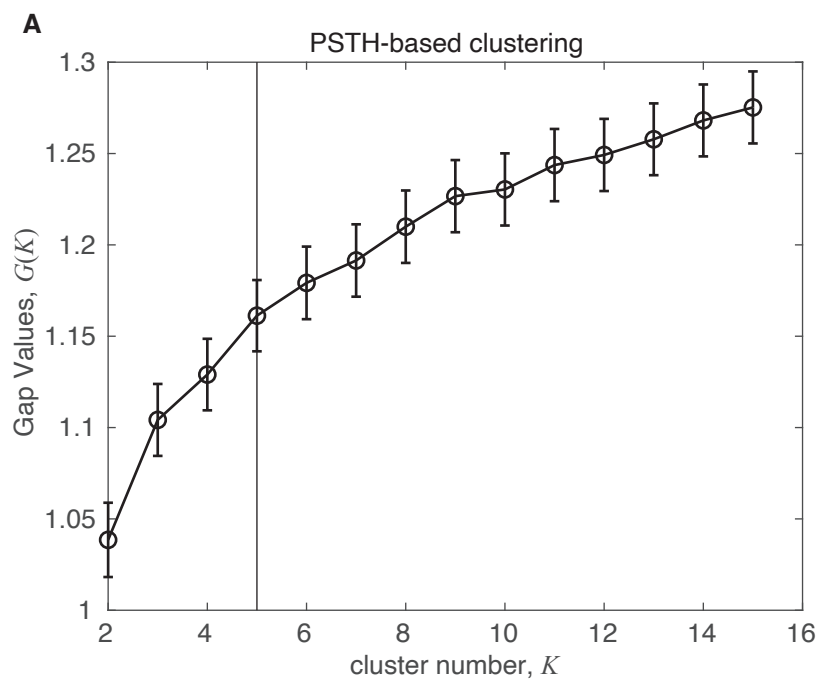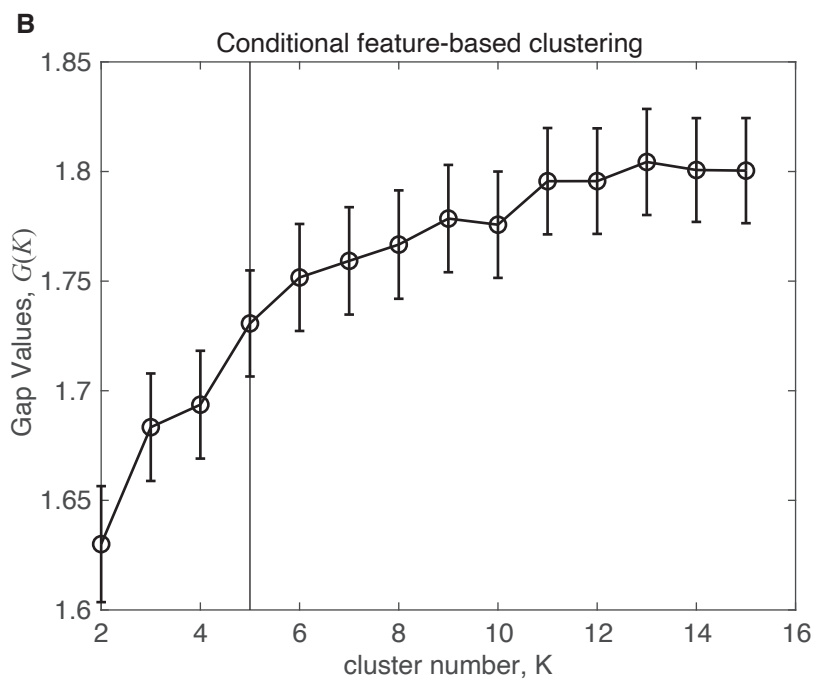

Supplement: supp [file elife_poa_e70129_Figure_2_figure_supplement_1.pdf › elife_poa_e70129_Figure_2_figure_supplement_1.pdf]

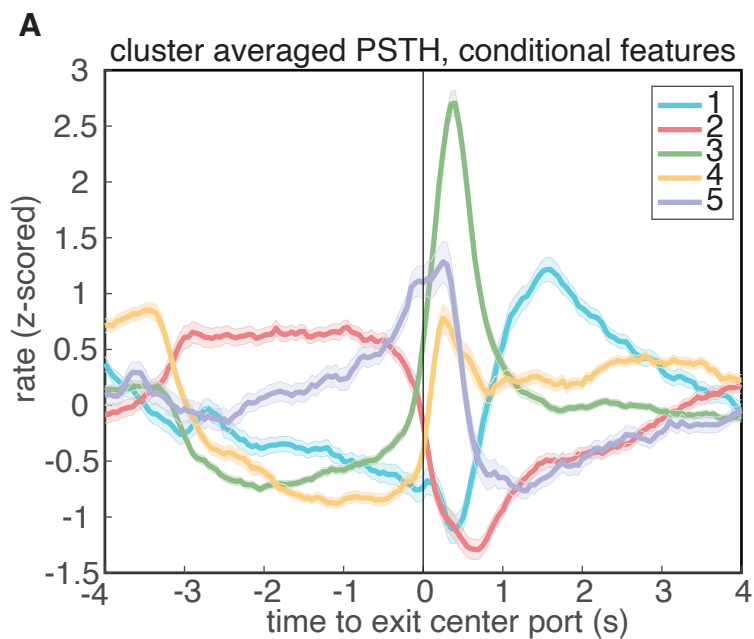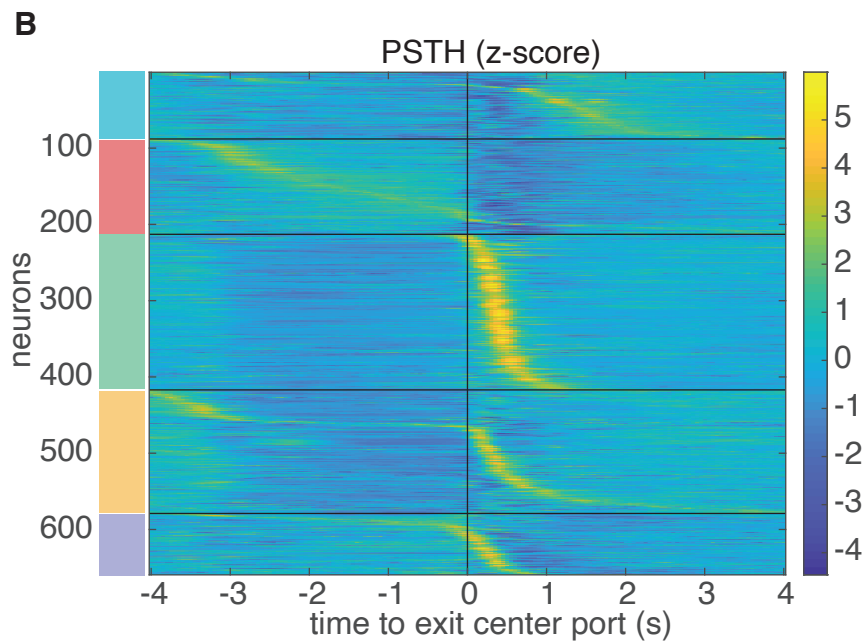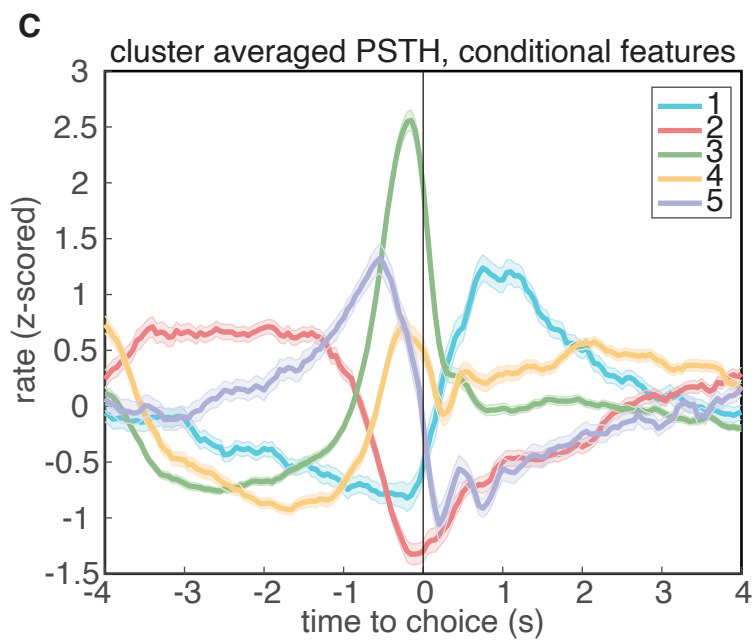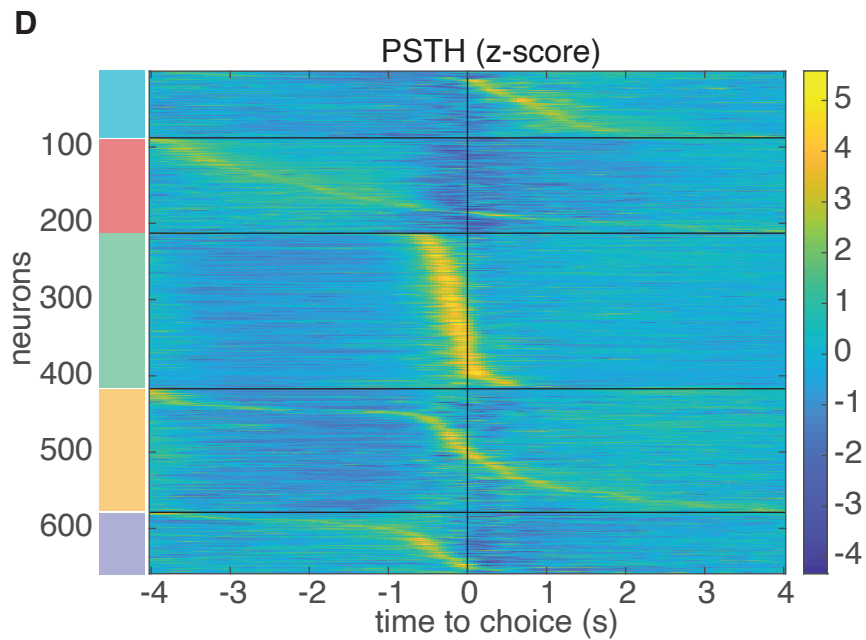

Supplement: supp [file elife_poa_e70129_Figure_2_figure_supplement_2.pdf › elife_poa_e70129_Figure_2_figure_supplement_2.pdf]

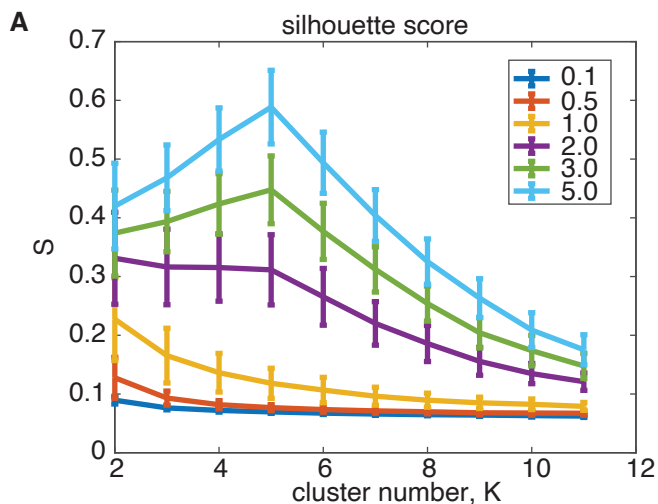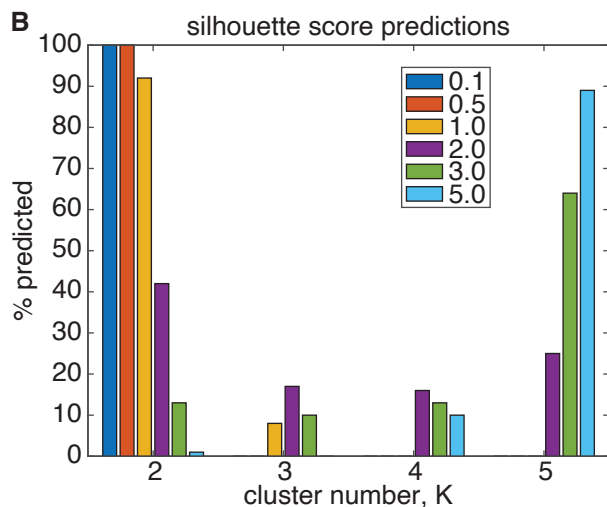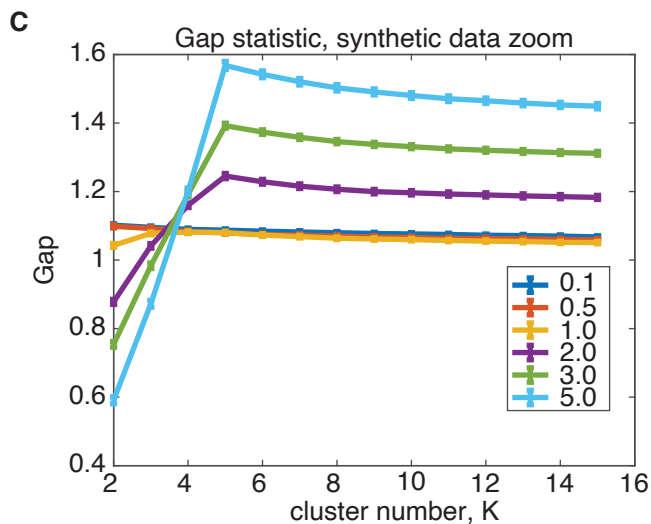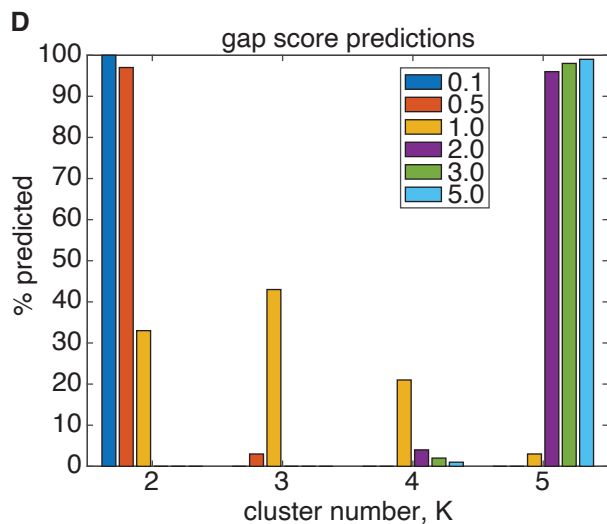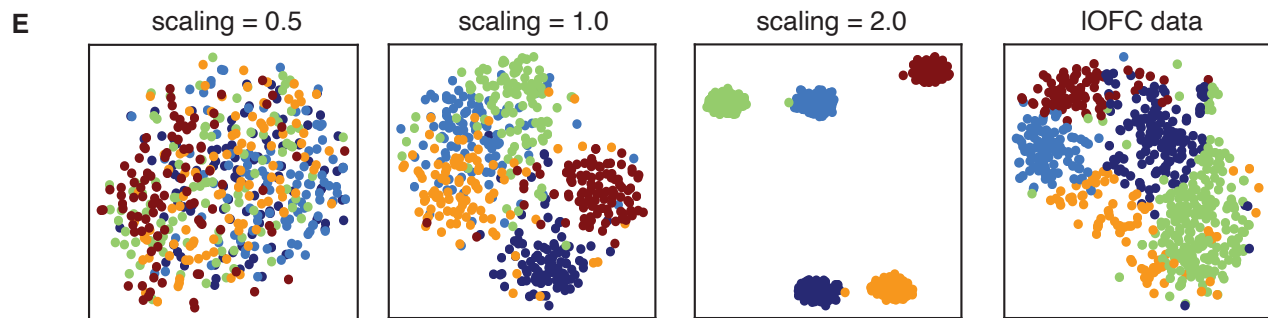

Supplement: supp [file elife_poa_e70129_Figure_2_figure_supplement_5.pdf › elife_poa_e70129_Figure_2_figure_supplement_5.pdf]

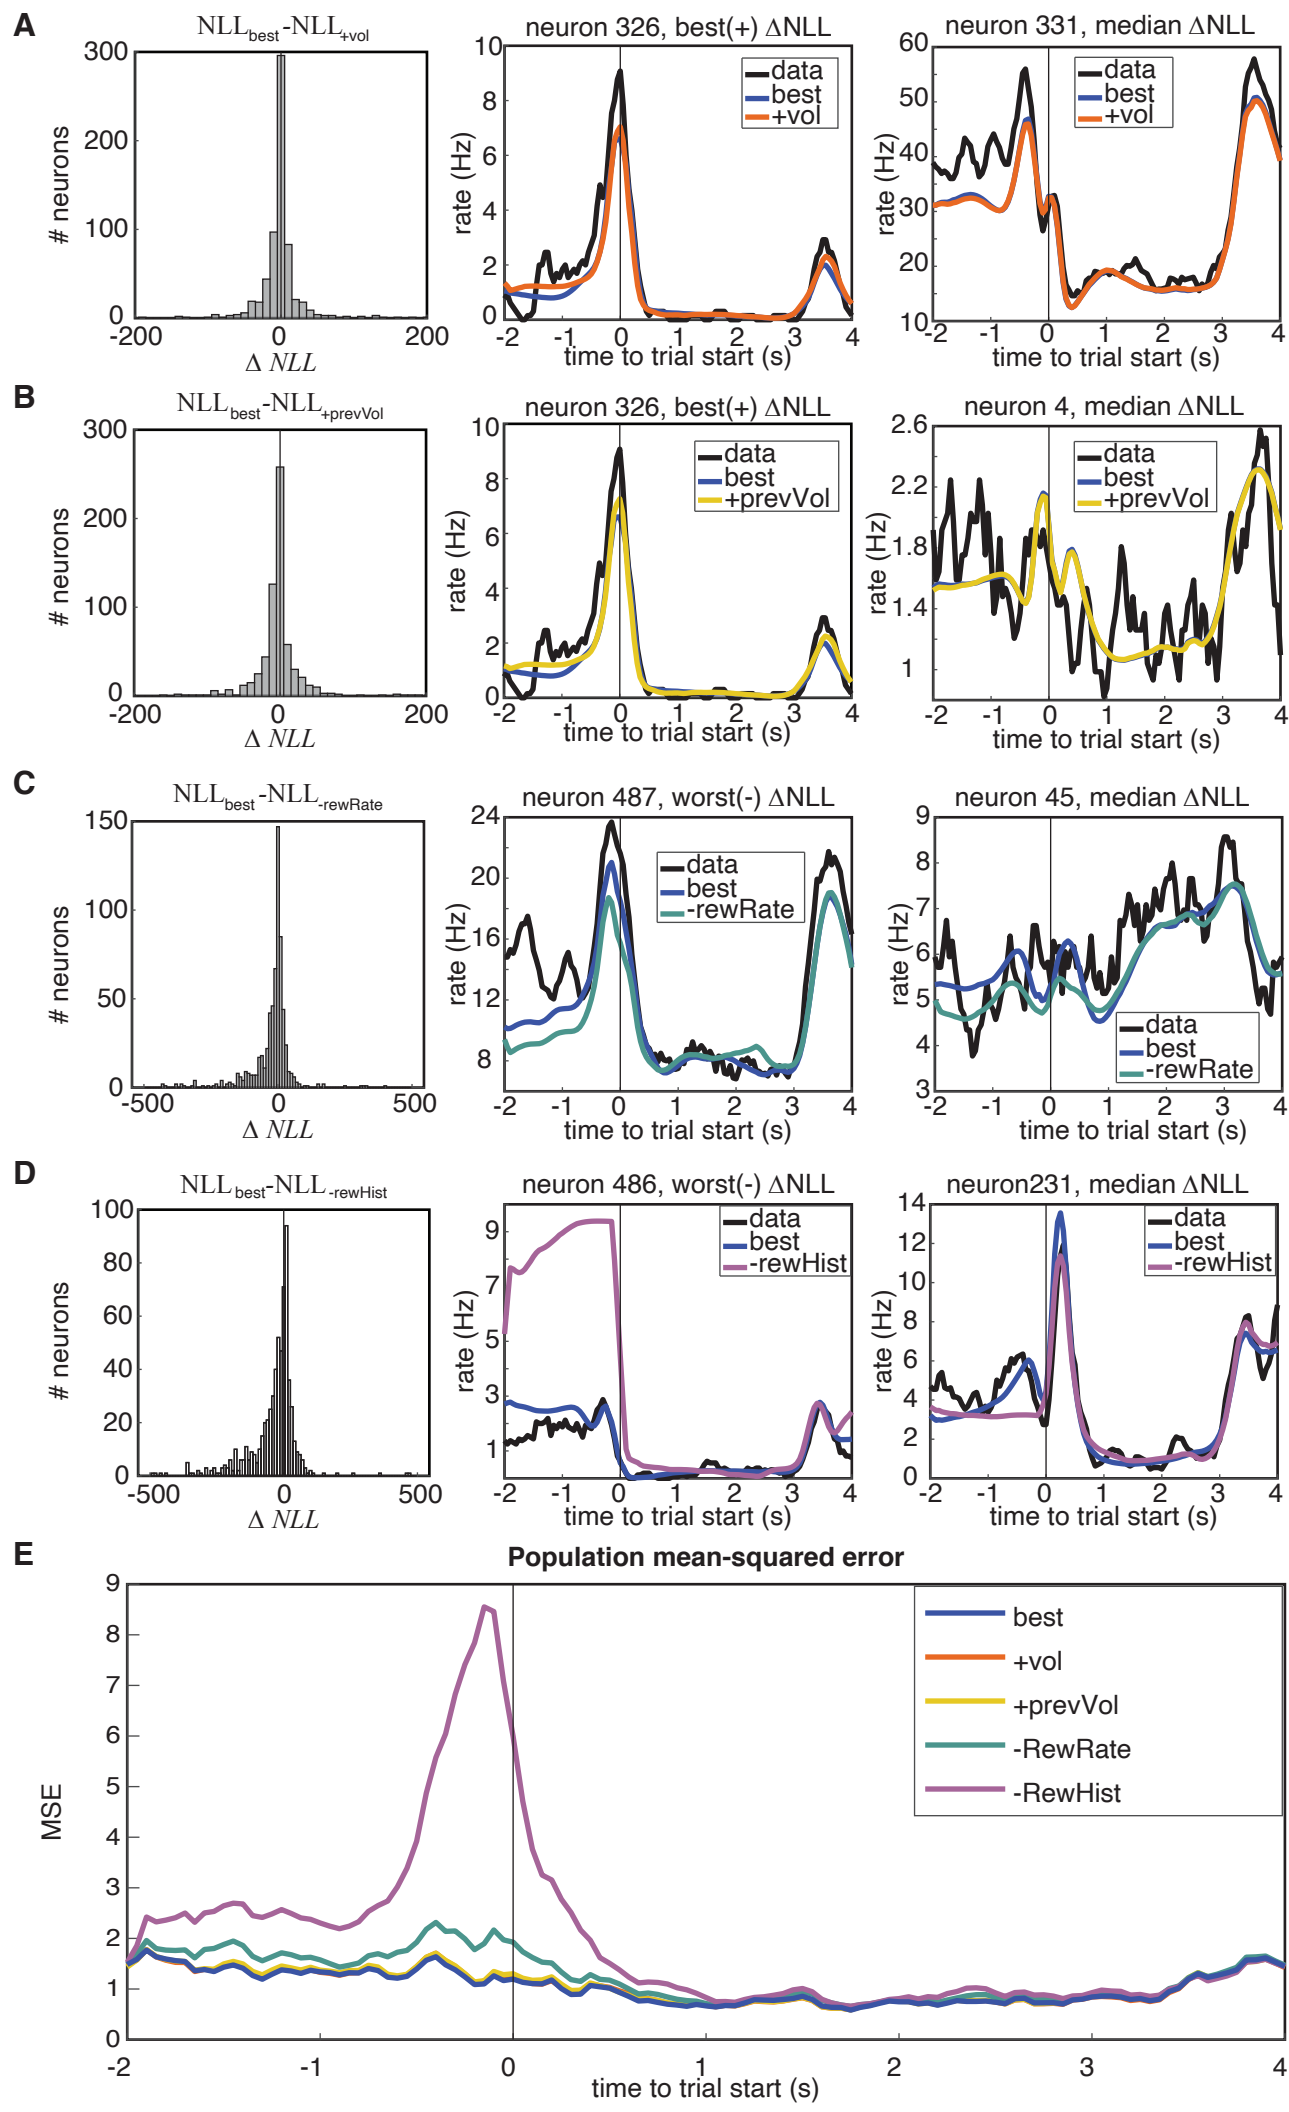

Supplement: supp [file elife_poa_e70129_Figure_3_figure_supplement_1.pdf › elife_poa_e70129_Figure_3_figure_supplement_1.pdf]

# Variance explained

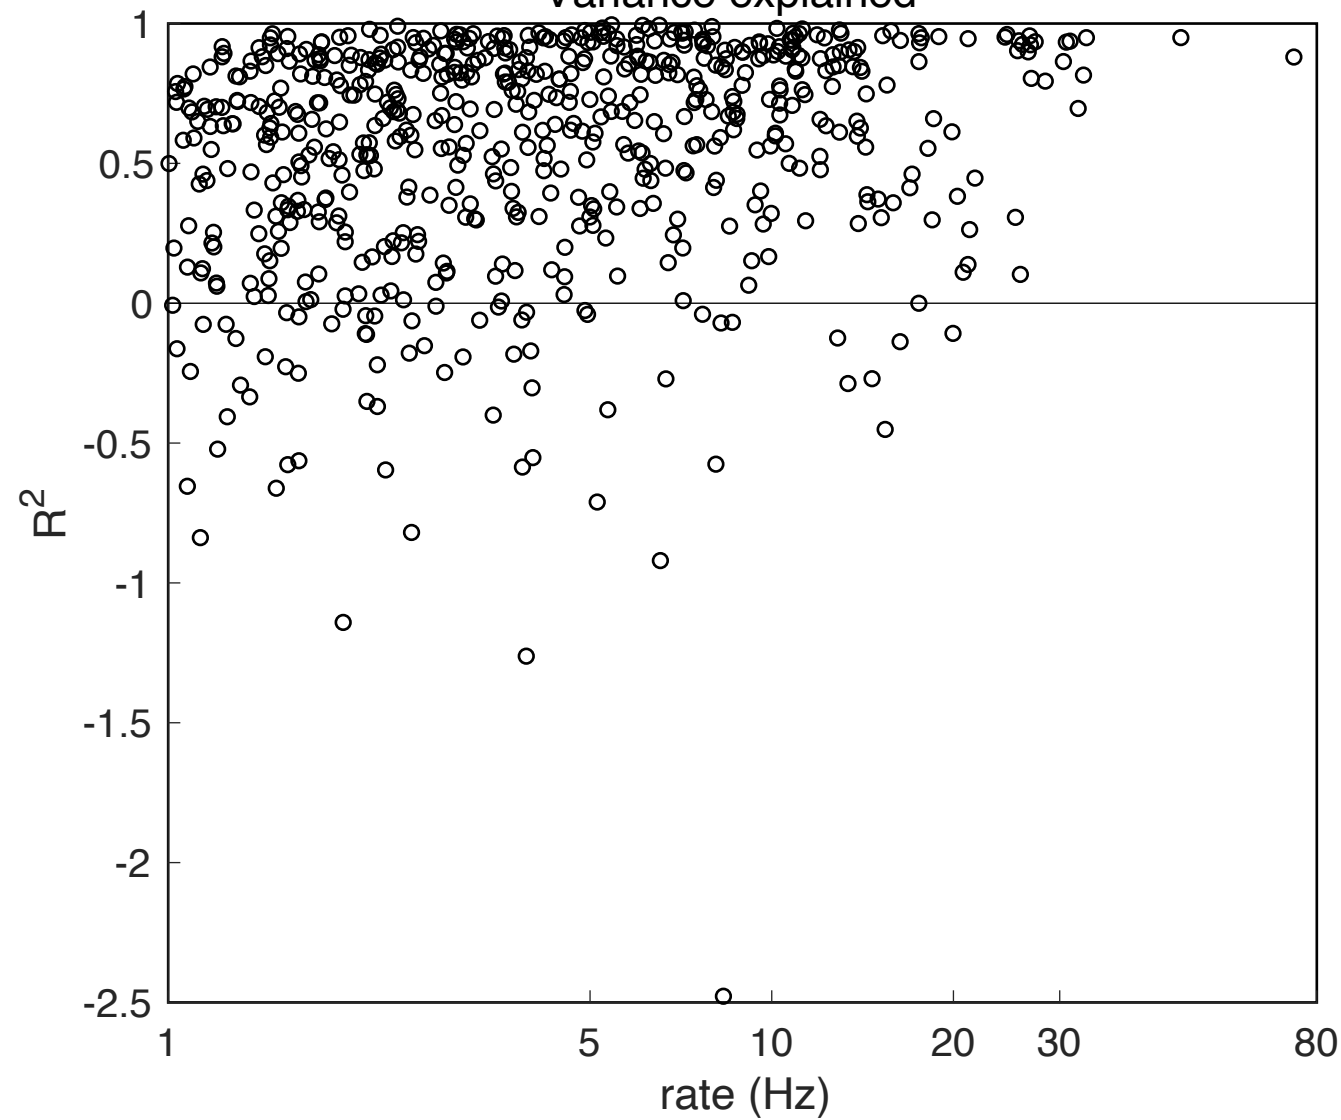

Supplement: supp [file elife_poa_e70129_Figure_3_figure_supplement_2.pdf › elife_poa_e70129_Figure_3_figure_supplement_2.pdf]

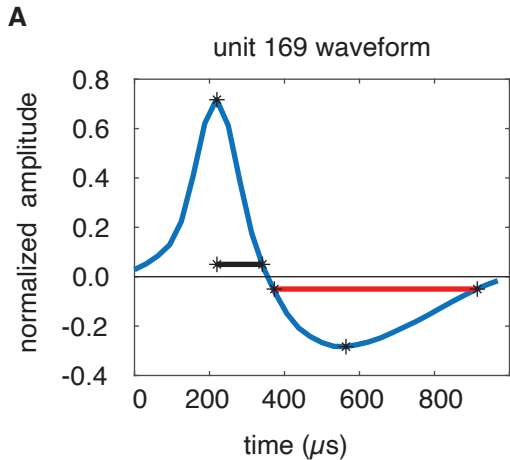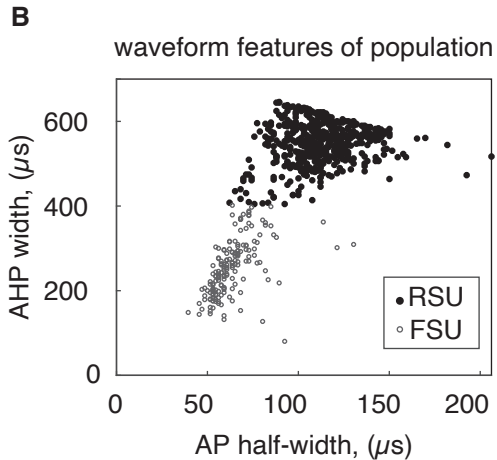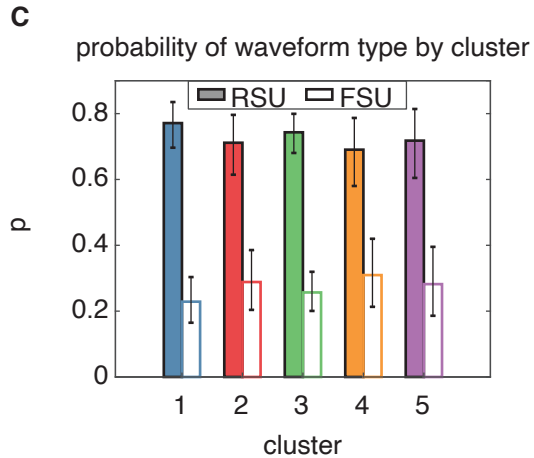

Supplement: supp [file elife_poa_e70129_Figure_4_figure_supplement_1.pdf › elife_poa_e70129_Figure_4_figure_supplement_1.pdf]

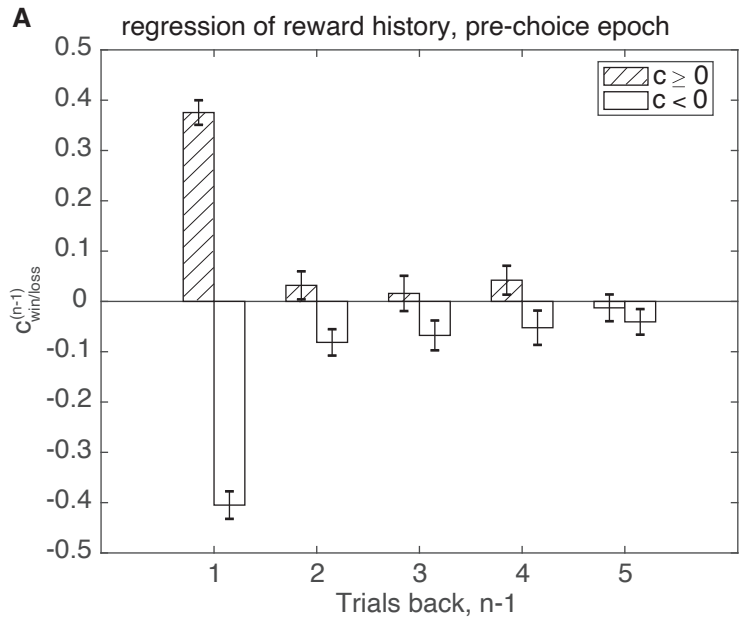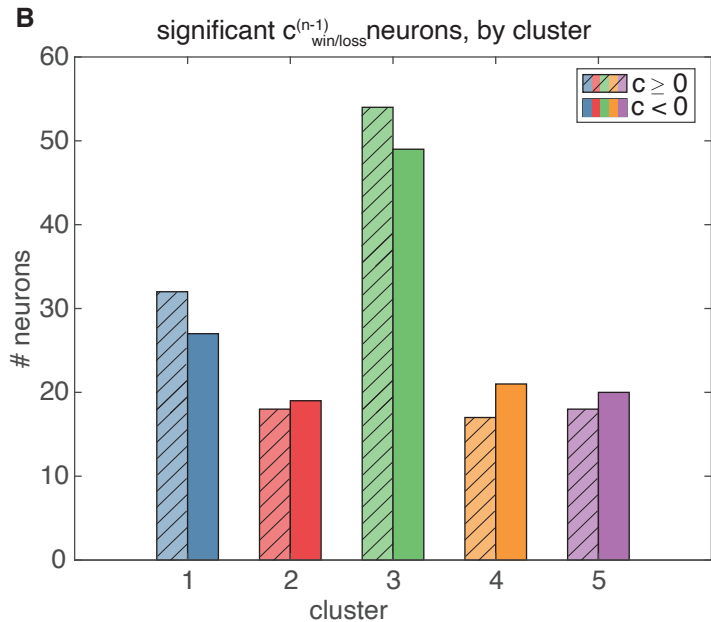

Supplement: supp [file elife_poa_e70129_Figure_5_figure_supplement_1.pdf › elife_poa_e70129_Figure_5_figure_supplement_1.pdf]

**A**

cluster label consistency

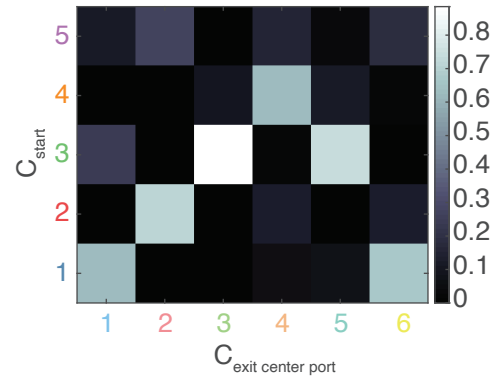**B**

PSTH (z-score)

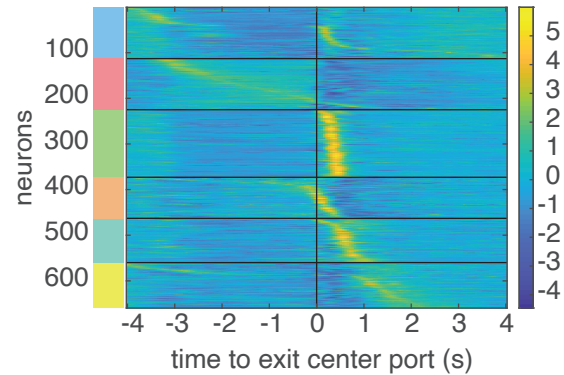**C** $d'$  for previous wins v previous losses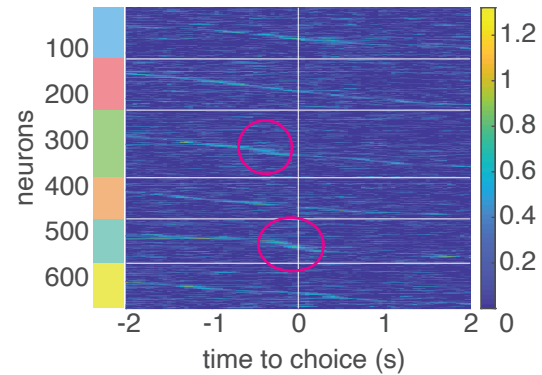

Supplement: supp [file elife_poa_e70129_Figure_5_figure_supplement_2.pdf › elife_poa_e70129_Figure_5_figure_supplement_2.pdf]

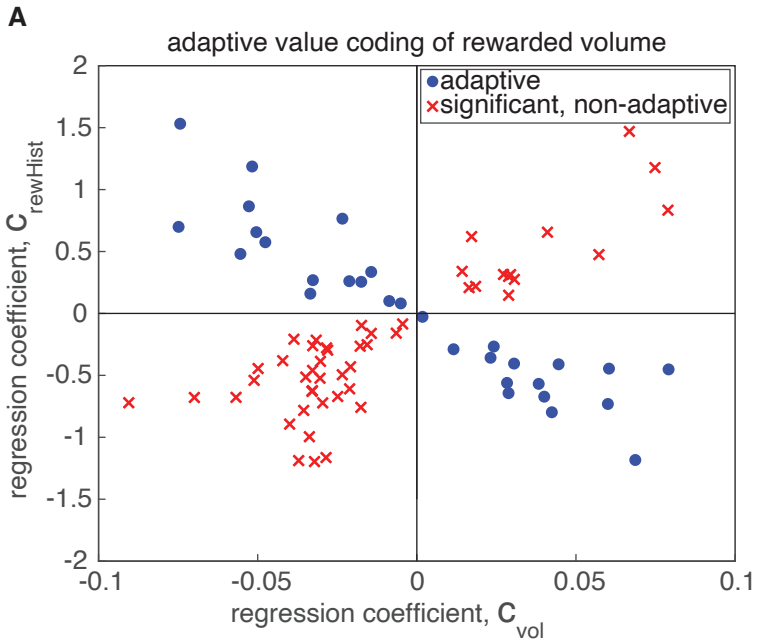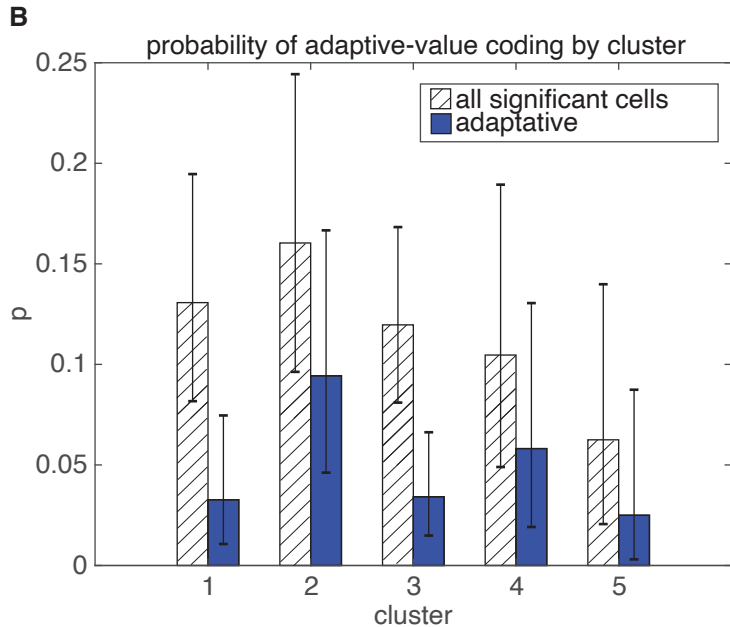

Supplement: supp [file elife_poa_e70129_Figure_6_fgure_supplement_2.pdf › elife_poa_e70129_Figure_6_fgure_supplement_2.pdf]

variance explained, RPE vs. win/loss regression

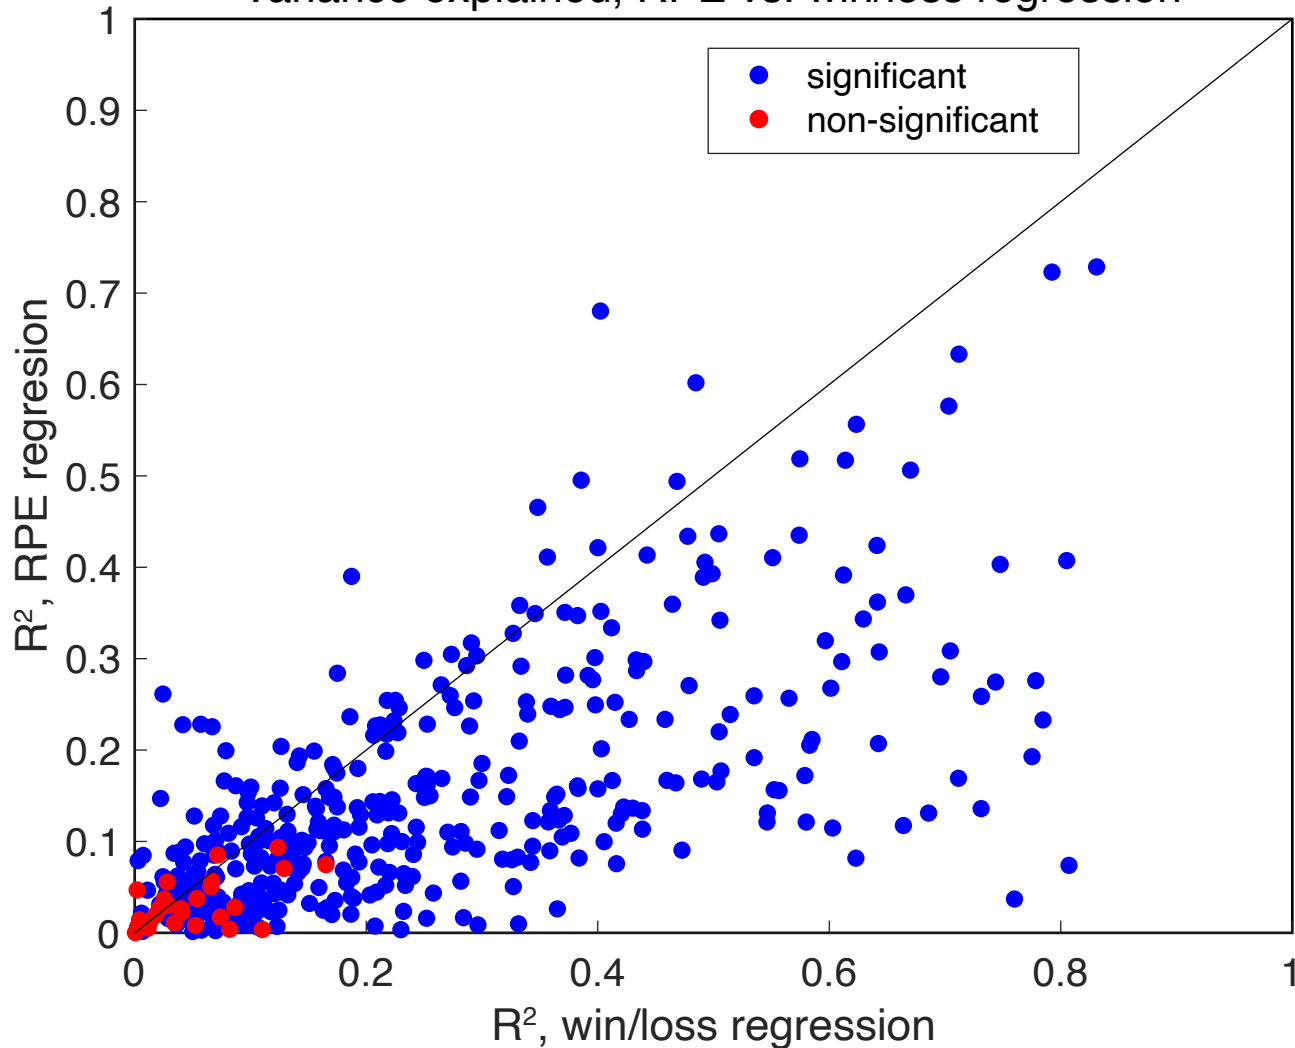

Supplement: supp [file elife_poa_e70129_Figure_6_figure_supplement_1.pdf › elife_poa_e70129_Figure_6_figure_supplement_1.pdf]
